# Supplementary material
Source: PubMed Central journal article supplement (PMC6035083)
Supplement: NIHMS939545-supplement-10508_2017_1103_MOESM1_ESM.pdf [file NIHMS939545-supplement-10508_2017_1103_MOESM1_ESM.pdf]

## Appendix A. Survey

1) (eligible to participate)\*

2) What is your age?\*

---

3) What is your sex?\*

Male

Female

Transgender

4) Have you had sex in the past 2 weeks?\*

Yes

No

5) What type(s) of sex have you had in the past 2 weeks?\*

Oral sex

Vaginal sex

Anal sex with a man

Anal sex with a woman

6) Have you used a condom in the past 2 weeks?\*

Yes

No

Don't know

7) How old were you when you first started using condoms?\*

---

8) In general, how do you feel about using condoms?\*

Strongly dislike

Dislike

Neutral

- Like
- Strongly like

**9) Thinking about the past 6 months, how often have you had sex?\***

- Once a month
- 2-3 times a month
- Once a week
- 2-3 times a week
- More than 3 times a week

**10) Think again about the past 6 months, how often did you use a condom while having sex?\***

- Rarely
- Some of the time
- Most of the time
- All of the time

**11) Have you ever had issues maintaining an erection while using a condom?\***

- Yes
- No

**Think about the last time you used a condom and who you used this condom with.**

**12) Was this partner:\***

- Male
- Female
- Transgender

**13) Please give this partner a nickname. We will use this nickname to refer to your partner for the rest of the survey. The nickname could be the place you met, or a color they like, or their first name. Do NOT provide the last name of your partner. \***

---

**Still thinking about the last time you used a condom with [Partner Nickname]:**

**14) What type of sex did you have when you used this condom? Check all that apply.\***

I used the condom for vaginal sex

I used the condom for anal sex

I used the condom for oral sex

**In the next questions, we are going to ask you about your sexual experience with this condom.**

**15) Did you ejaculate (cum)?\***

Yes

No

**For the next several questions, use the slider to show how much you disagree or agree with the statement. **Remember** that we are asking you to think about the most recent time you had sex and used a condom with [Partner Nickname].**

**16) The orgasm was outstanding.\***

0 \_\_\_\_\_ [ ] \_\_\_\_\_ 100

**17) The timing of my ejaculation (cum) was just right.\***

0 \_\_\_\_\_ [ ] \_\_\_\_\_ 100

**18) The physical sensation on my penis was outstanding.\***

0 \_\_\_\_\_ [ ] \_\_\_\_\_ 100

**19) This sex was very pleasurable.\***

0 \_\_\_\_\_ [ ] \_\_\_\_\_ 100

**20) I was able to maintain my erection through the sex act.\***

0 \_\_\_\_\_ [ ] \_\_\_\_\_ 100

**21) The firmness of my erection was ideal during sex.\***

0 \_\_\_\_\_ [ ] \_\_\_\_\_ 100

**22) My penis was comfortable during sex (for example, not pinched).\***

0 \_\_\_\_\_ [ ] \_\_\_\_\_ 100

**23) I was highly physically aroused during sex.\***

0 \_\_\_\_\_ [ ] \_\_\_\_\_ 100

**24) My penis felt sore or was chafed during sex.\***

0 \_\_\_\_\_ [ ] \_\_\_\_\_ 100

**25) This condom felt like wearing nothing.\***

0 \_\_\_\_\_ [ ] \_\_\_\_\_ 100

**26) This condom helped me enjoy sex.\***

0 \_\_\_\_\_ [ ] \_\_\_\_\_ 100

**27) This condom helped me have better sex.\***

0 \_\_\_\_\_ [ ] \_\_\_\_\_ 100

**Just a few more questions about [Partner Nickname]:**

**28) In the time you have known [Partner Nickname], have you had sex once or more than once?\***

Once

More than once

**29) Are you in a committed relationship with [Partner Nickname]?\***

Yes

No

**30) What is the quality of sex in your relationship with [Partner Nickname]?\***



|                   |  |  |  |  |  |  |  |                 |
|-------------------|--|--|--|--|--|--|--|-----------------|
| Very unsatisfying |  |  |  |  |  |  |  | Very satisfying |
| Worthless         |  |  |  |  |  |  |  | Very valuable   |

**35) In general, how would you describe your *sexual* relationship with [Partner Nickname]? For *each* pair of words below, select the number which best describes your relationship, as a whole.\***

|                   |   |   |   |   |   |   |   |                 |
|-------------------|---|---|---|---|---|---|---|-----------------|
| Very bad          | 1 | 2 | 3 | 4 | 5 | 6 | 7 | Very good       |
| Very unpleasant   |   |   |   |   |   |   |   | Very pleasant   |
| Very negative     |   |   |   |   |   |   |   | Very positive   |
| Very unsatisfying |   |   |   |   |   |   |   | Very satisfying |
| Worthless         |   |   |   |   |   |   |   | Very valuable   |

**Just a few more questions about yourself!**

**36) Do you consider yourself to be Hispanic or Latino?\***

- Yes
- No
- Don't know
- Prefer not to answer

**37) What racial group do you consider yourself to be in?\***

- Asian/Pacific Islander
- Black/African American
- White/Caucasian
- Native American/Alaska Native
- Multi-Racial
- Prefer not to answer
- Other: \_\_\_\_\_

**38) You indicated that you are multi-racial. Please check all of the racial groups you consider yourself to be in:**

- Asian/Pacific Islander
- Black/African American
- White/Caucasian
- Native American/Alaska Native
- Other

**39) What is the highest level in school that you completed?\***

- College, post graduate, or professional school
- Some college, Associate's degree and/or Technical School
- High school or GED
- Did not finish high school
- Don't know
- Prefer not to answer

**40) Which of the following best describes your current marital status?\***

- Legally married
- Registered domestic partnership or civil union
- Widowed
- Divorced
- Separated
- Never married
- Prefer not to answer

**41) What was your household income last year from all sources before taxes (monthly/yearly)?\***

- 0 to \$1667 (monthly) / 0 to \$19,999 (yearly)
- \$1668 to \$4167 (monthly) / \$20,000 to \$49,999 (yearly)
- \$4168 to \$6250 (monthly) / \$50,000 to \$74,999 (yearly)
- \$6251 or more (monthly) / \$75,000 or more (yearly)
- Don't know
- Prefer not to answer
