# Supplementary material
Source: PubMed Central journal article supplement (PMC6035083)

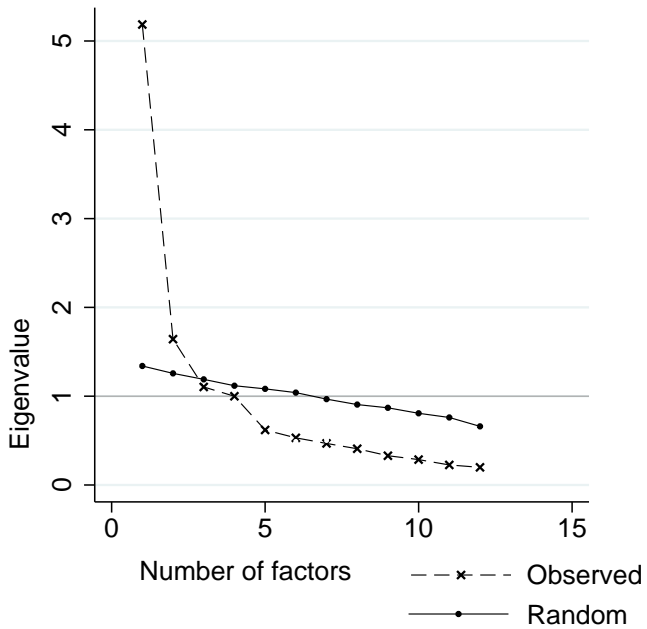

Supplement: NIHMS939545-supplement-10508_2017_1103_MOESM2_ESM.pdf [file NIHMS939545-supplement-10508_2017_1103_MOESM2_ESM.pdf]
